# Supplementary material
Source: PubMed Central journal article supplement (PMC3889777)
Supplement: JCM.01581-13_zjm999092867so1.pdf [file JCM.01581-13_zjm999092867so1.pdf]

**TABLE S1** Yeast species isolates identified by the ITS sequencing-based method and included in the study<sup>a</sup>

| Species                                                                                                                 | No. of isolates |
|-------------------------------------------------------------------------------------------------------------------------|-----------------|
| <b>Common species</b>                                                                                                   | <b>224</b>      |
| <i>Candida albicans</i>                                                                                                 | 140             |
| <i>Candida glabrata</i> complex (35 <i>C. glabrata</i> , 2 <i>Candida nivariensis</i> )                                 | 37              |
| <i>Candida krusei</i>                                                                                                   | 6               |
| <i>Candida parapsilosis</i> complex (16 <i>C. parapsilosis</i> , 3 <i>C. metapsilosis</i> , 2 <i>C. orthopsilosis</i> ) | 21              |
| <i>Candida tropicalis</i>                                                                                               | 10              |
| <i>Cryptococcus neoformans</i>                                                                                          | 4               |
| <i>Saccharomyces cerevisiae</i>                                                                                         | 6               |
| <b>Rare species</b>                                                                                                     | <b>26</b>       |
| <i>Blastoschizomyces capitatus</i> <sup>a</sup>                                                                         | 2               |
| <i>Candida dubliniensis</i>                                                                                             | 1               |
| <i>Candida guilliermondii</i>                                                                                           | 2               |
| <i>Candida kefyr</i>                                                                                                    | 2               |
| <i>Candida lambica</i>                                                                                                  | 1               |
| <i>Candida lipolytica</i>                                                                                               | 1               |
| <i>Candida lusitanae</i>                                                                                                | 3               |
| <i>Candida norvegensis</i>                                                                                              | 2               |
| <i>Candida pararugosa</i>                                                                                               | 1               |
| <i>Candida utilis</i>                                                                                                   | 1               |
| <i>Pichia caribbica</i>                                                                                                 | 1               |
| <i>Pichia fabianii</i>                                                                                                  | 1               |
| <i>Pichia manshurica</i>                                                                                                | 2               |
| <i>Pichia onychis</i>                                                                                                   | 1               |
| <i>Rhodotorula mucilaginosa</i>                                                                                         | 2               |
| <i>Trichosporon inkin</i>                                                                                               | 1               |
| <i>Trichosporon mucoides</i>                                                                                            | 1               |
| <i>Trichosporon asahii</i>                                                                                              | 1               |

<sup>a</sup> ITS, internal transcribed spacer.

<sup>b</sup> This species is included as *Geotrichum capitatum* in the Vitek 2 database.
