# Supplementary material
Source: PubMed Central journal article supplement (PMC3889777)
Supplement: JCM.01581-13_zjm999092867so2.pdf [file JCM.01581-13_zjm999092867so2.pdf]

**TABLE S2** Time-to-result for the yeast isolates identified by the BD Phoenix system<sup>a</sup>

| <b>Species</b>                      | <b>No. of isolates</b> | <b>Mean (h)<sup>b</sup></b> | <b>SD</b> | <b>Range (h)</b> |
|-------------------------------------|------------------------|-----------------------------|-----------|------------------|
| All species                         | 250                    | 6.90                        | 3.88      | 4.09-15.47       |
| <i>Candida albicans</i>             | 140                    | 5.43                        | 2.13      | 4.09-15.47       |
| <i>Candida glabrata</i> complex     | 37                     | 8.90                        | 3.14      | 4.11-15.44       |
| <i>C. glabrata</i>                  | 35                     | 8.74                        | 3.03      | 4.11-15.44       |
| <i>C. nivariensis</i>               | 2                      | 11.62                       | 4.91      | 8.15-15.10       |
| <i>Candida krusei</i>               | 6                      | 13.53                       | 4.50      | 4.33-15.43       |
| <i>Candida parapsilosis</i> complex | 21                     | 7.74                        | 3.18      | 4.22-15.42       |
| <i>C. parapsilosis</i>              | 16                     | 8.10                        | 3.56      | 4.22-15.42       |
| <i>C. metapsilosis</i>              | 3                      | 6.90                        | 2.30      | 4.24-8.24        |
| <i>C. orthopsilosis</i>             | 2                      | 6.89                        | 2.30      | 4.24-8.26        |
| <i>Candida tropicalis</i>           | 10                     | 6.84                        | 4.68      | 4.11-15.45       |
| <i>Cryptococcus neoformans</i>      | 4                      | 15.38                       | 0.05      | 15.35-15.46      |
| <i>Saccharomyces cerevisiae</i>     | 6                      | 4.28                        | 0.09      | 4.16-4.39        |
| <i>Blastoschizomyces capitatus</i>  | 2                      | 9.83                        | 7.95      | 4.21-15.46       |
| <i>Candida dubliniensis</i>         | 1                      | 15.41                       | ND        | ND               |
| <i>Candida guilliermondii</i>       | 2                      | 8.16                        | 0.03      | 8.14-8.19        |
| <i>Candida kefyr</i>                | 2                      | 4.21                        | 0.03      | 4.19-4.24        |
| <i>Candida lambica</i>              | 1                      | 15.28                       | ND        | ND               |
| <i>Candida lipolytica</i>           | 1                      | 15.29                       | ND        | ND               |
| <i>Candida lusitanae</i>            | 3                      | 12.95                       | 4.20      | 8.11-15.46       |
| <i>Candida norvegensis</i>          | 2                      | 15.43                       | 0.01      | 15.42-15.43      |
| <i>Candida pararugosa</i>           | 1                      | 15.28                       | ND        | ND               |
| <i>Candida utilis</i>               | 1                      | 4.08                        | ND        | ND               |
| <i>Pichia caribbica</i>             | 1                      | 15.45                       | ND        | ND               |
| <i>Pichia fabianii</i>              | 1                      | 15.30                       | ND        | ND               |
| <i>Pichia manshurica</i>            | 2                      | 15.48                       | 0.03      | 15.46-15.51      |
| <i>Pichia onychis</i>               | 1                      | 15.42                       | ND        | ND               |
| <i>Rhodotorula mucilaginosa</i>     | 2                      | 11.73                       | 5.01      | 8.19-15.28       |
| <i>Trichosporon inkin</i>           | 1                      | 8.26                        | ND        | ND               |
| <i>Trichosporon mucoides</i>        | 1                      | 4.26                        | ND        | ND               |

*Trichosporon asahii*

1

8.25

ND

ND

---

ND, not determined.

<sup>a</sup> The time-to-result by the Vitek 2 system, used as comparator to Phoenix BD, was of 18.00 h for all the yeast isolates identified.

<sup>b</sup> For species with one isolate, the mean value corresponds to the value of the single isolate.
